# Supplementary material
Source: PubMed Central journal article supplement (PMC4274777)

## SUPPLEMENTARY DATA

### DPPOS Research Group Investigators

#### *Pennington Biomedical Research Center (Baton Rouge, LA)*

George A. Bray, MD\*  
Annie Chatellier, RN, CCRC\*\*  
Crystal Duncan, LPN  
Frank L. Greenway, MD  
Erma Levy, RD  
Donna H. Ryan, MD

#### *University of Chicago (Chicago, IL)*

David Ehrmann, MD\*  
Margaret J. Matulik, RN, BSN\*\*  
Kirsten Czech, MS  
Catherine DeSandre, BA

#### *Jefferson Medical College (Philadelphia, PA)*

Barry J. Goldstein, MD, PhD\*  
Kevin Furlong, DO\*  
Kellie A. Smith, RN, MSN\*\*  
Wendi Wildman, RN\*\*  
Constance Pepe, MS, RD

#### *University of Miami (Miami, FL)*

Ronald B. Goldberg, MD\*  
Jeanette Calles, MEd\*\*  
Juliet Ojito, RN\*\*  
Sumaya Castillo-Florez, MPH  
Hermes J. Florez, MD, PhD  
Anna Giannella, RD, MS  
Olga Lara  
Beth Veciana

#### *The University of Texas Health Science Center (San Antonio, TX)*

Steven M. Haffner, MD, MPH\*  
Helen P. Hazuda, PhD\*  
Maria G. Montez, RN, MSHP, CDE\*\*  
Carlos Lorenzo, MD, PhD  
Arlene Martinez, RN, BSN, CDE

#### *University of Colorado (Denver, CO)*

Richard F. Hamman, MD, DrPH\*  
Dana Dabelea, MD, PhD\*  
Lisa Testaverde, MS\*\*  
Alexis Bouffard, MA, RN, BSN  
Tonya Jenkins, RD, CDE  
Dione Lenz, RN, BSN, CDE  
Leigh Perreault, MD  
David W. Price, MD  
Sheila C. Steinke, MS

#### *Joslin Diabetes Center (Boston, MA)*

Edward S. Horton, MD\*

Catherine S. Poirier, RN, BSN\*\*  
Kati Swift, RN, BSN\*\*  
Enrique Caballero, MD  
Barbara Fagnoli, RD  
Ashley Guidi, BS  
Mathew Guido, BA  
Sharon D. Jackson, MS, RD, CDE  
Lori Lambert, MS, RD, LD  
Kathleen E. Lawton, RN  
Sarah Ledbury, Med, RD  
Jessica Sansoucy, BS  
Jeanne Spellman, RD

#### *VA Puget Sound Health Care System and University of Washington (Seattle, WA)*

Steven E. Kahn, MB, ChB\*  
Brenda K. Montgomery, RN, BSN, CDE\*\*  
Wilfred Fujimoto, MD  
Robert H. Knopp, MD (deceased)  
Edward W. Lipkin, MD  
Anne Murillo, BS  
Dace Trencce, MD

#### *University of Tennessee (Memphis, TN)*

Abbas E. Kitabchi, PhD, MD, FACP\*  
Samuel Dagogo-Jack, MD, MSc, FRCP, FACP\*  
Mary E. Murphy, RN, MS, CDE, MBA\*\*  
Jennifer Dolgoff, RN, BSN  
William B. Applegate, MD, MPH  
Michael Bryer-Ash, MD  
Sandra L. Frieson, RN  
Uzoma Ibebuogu, MD  
Helen Lambeth, RN, BSN  
Lynne C. Lichtermann, RN, BSN  
Hooman Otkaei, MD  
Lily M.K. Rutledge, RN, BSN  
Amy R. Sherman, RD, MS, LDN, CDE  
Clara M. Smith, RD, MHP, LDN  
Judith E. Soberman, MD  
Beverly Williams-Cleaves, MD

#### *Northwestern University's Feinberg School of Medicine (Chicago, IL)*

Boyd E. Metzger, MD\*  
Mark E. Molitch, MD\*  
Mariana K. Johnson, MS, RN\*\*  
Mimi M. Giles, MS, RD  
Diane Larsen, BS  
Charlotte Niznik, MS, RN, CDE  
Samsam C. Pen, BA

SUPPLEMENTARY DATA

Pamela A. Schinleber, RN, MS

**Massachusetts General Hospital (Boston, MA)**

David M. Nathan, MD\*

Mary Larkin, MSN\*

Charles McKittrick, BSN\*\*

Heather Turgeon, BSN

Ellen Anderson, MS, RD

Laurie Bissett, MS, RD

Kristy Bondi, BS

Enrico Cagliero, MD

Kali D'Anna

Linda Delahanty, MS, RD

Jose C. Florez, MD, PhD

Valerie Goldman, MS, RD

Alexandra Poulos

Elyse Raymond, BS

Christine Stevens, RN

Beverly Tseng

**University of California-San Diego (San Diego, CA)**

Elizabeth Barrett-Connor, MD\*

Mary Lou Carrion-Petersen, RN, BSN\*\*

Lauren N. Claravall, BS

Jonalle M. Dowden, BS

Javiva Horne, RD

Diana Leos, RN, BSN

Sundar Mudaliar, MD

Jean Smith, RN

Simona Szerdi Janisch, BS

Karen Vejvoda, RN, BSN, CDE, CCRC

**St. Luke's-Roosevelt Hospital (New York, NY)**

F. Xavier Pi-Sunyer, MD\*

Jane E. Lee, MS\*\*

Sandra T. Foo, MD

Susan Hagamen, MS, RN, CDE

**Indiana University (Indianapolis, IN)**

David G. Marrero, PhD\*

Susie M. Kelly, RN, CDE\*\*

Ronald T. Ackermann, MD

Edwin S. Fineberg, MD

Angela Hadden

Marcia A. Jackson

Marion S. Kirkman, MD

Kieren J. Mather, MD

Paris J. Roach, MD

Madelyn L. Wheeler, RD

**Medstar Research Institute (Washington, DC)**

Robert E. Ratner, MD\*

Vanita Aroda, MD\*

Sue Shapiro, RN, BSN, CCRC\*\*

Catherine Bavido-Arrage, MS, RD, LD

Lilia Leon

Gabriel Uwaifo, MD

Debra Wells-Thayer, NP, CDE

Renee Wiggins, RD

**University of Southern California/UCLA Research Center (Alhambra, CA)**

Mohammed F. Saad, MD\*

Karol Watson, MD\*

Medhat Botrous, MD\*\*

Sujata Jinagouda, MD\*\*

Maria Budget

Claudia Conzues

Perpetua Magpuri

Kathy Ngo

Kathy Xaphthalmous

**Washington University (St. Louis, MO)**

Neil H. White, MD, CDE\*

Samia Das, MS, MBA, RD, LD\*\*

Ana Santiago, RD

Angela L. Brown, MD

Cormarie Wernimont, RD, LD

**Johns Hopkins School of Medicine (Baltimore, MD)**

Christopher D. Saudek, MD\* (deceased)

Sherita Hill Golden, MD, MHS, FAHA\*

Tracy Whittington, BS\*\*

Frederick L. Brancati, MD, MHS (deceased)

Jeanne M. Clark, MD

Alicia Greene

Dawn Jiggetts

Henry Mosley

John Reusing

Richard R. Rubin, PhD (deceased)

Shawne Stephens

Evonne Utsey

**University of New Mexico (Albuquerque, NM)**

David S. Schade, MD\*

Karwyn S. Adams, RN, MSN\*\*

Claire Hemphill, RN, BSN\*\*

Penny Hyde, RN, BSN\*\*

Janene L. Canady, RN, BSN, CDE

Kathleen Colleran, MD

## SUPPLEMENTARY DATA

Ysela Gonzales  
Doris A. Hernandez-McGinnis  
Carolyn King, MEd  
**Albert Einstein College of Medicine (Bronx, NY)**  
Jill Crandall, MD\*  
Janet O. Brown, RN, MPH, MSN\*\*  
Elsie Adorno, BS  
Helena Duffy, MS, C-ANP  
Angela Goldstein, FNP-C, NPP, CSW  
Jennifer Lukin, BA  
Helen Martinez, RN, MSN, FNP-C  
Dorothy Pompei, BA  
Harry Shamoon, MD  
Jonathan Scheindlin, MD  
Elizabeth A. Walker, RN, DNSc, CDE  
Judith Wylie-Rosett, EdD, RD  
**University of Pittsburgh (Pittsburgh, PA)**  
Trevor Orchard, MD\*  
Andrea Kriska, PhD\*  
Susan Jeffries, RN, MSN\*\*  
M. Kaye Kramer, BSN, MPH\*\*  
Marie Smith, RN, BSN\*\*  
Catherine Benchoff  
Stephanie Guimond, BS  
Jessica Pettigrew, CMA  
Debra Rubinstein, MD  
Linda Semler, MS, RD  
Elizabeth Venditti, PhD  
Valarie Weinzierl, MPH  
**University of Hawaii (Honolulu, HI)**  
Richard F. Arakaki, MD\*  
Narleen K. Baker-Ladao, BS\*\*  
Mae K. Isonaga, RD, MPH\*\*  
Nina E. Bermudez, MS  
Marjorie K. Mau, MD  
**Southwest American Indian Centers (Phoenix, AZ; Shiprock, NM; Zuni, NM)**  
William C. Knowler, MD, DrPH\*  
Norman Coeoyate\*\*  
Mary A. Hoskin, RD, MS\*\*  
Camille Natewa\*\*  
Carol A. Percy, RN, MS\*\*  
Kelly J. Acton, MD, MPH  
Vickie L. Andre, RN, FNP  
Shandiin Begay, MPH  
Brian C. Bucca, OD, FAAO  
Sherron Cook  
Matthew S. Doughty, MD

Justin Glass, MD  
Martia Glass, MD  
Robert L. Hanson, MD, MPH  
Doug Hassenpflug, OD  
Louise E. Ingraham, MS, RD, LN  
Kathleen M. Kobus, RNC-ANP  
Jonathan Krakoff, MD  
Catherine Manus, LPN  
Cherie McCabe  
Sara Michaels, MD  
Tina Morgan  
Julie A. Nelson, RD  
Robert J. Roy  
Miranda Smart  
Darryl P. Tonemah, PhD  
Charlton Wilson, MD  
**George Washington University Biostatistics Center (DPP Coordinating Center Rockville, MD)**  
Sarah Fowler, PhD\*  
Marinella Temprosa, PhD\*  
Michael D. Larsen, PhD\*  
Tina Brenneman\*\*  
Hanna Sherif, MS\*\*  
Sharon L. Edelstein, ScM\*\*  
Solome Abebe, MS  
Julie Bamdad, MS  
Melanie Barkalow  
Joel Bethupu  
Tsedenia Bezabeh  
Nicole Butler  
Jackie Callaghan  
Costas Christophi, PhD  
Gregory Dwyer  
Mary Foulkes, PhD  
Yuping Gao  
Robert Gooding  
Adrienne Gottlieb  
Nisha Grover  
Heather Hoffman, PhD  
Kathleen Jablonski, PhD  
Richard Katz, MD  
Preethy Kolinjivadi, MS  
John M. Lachin, ScD  
Yong Ma, PhD  
Qing Pan, PhD  
Susan Reamer  
Alla Sapozhnikova  
**Lifestyle Resource Core**

## SUPPLEMENTARY DATA

Elizabeth M. Venditti, PhD\*

Andrea M. Kriska, PhD

Linda Semler, MS, RD

Valarie Weinzierl, MPH

**Central Biochemistry Laboratory (Seattle, WA)**

Santica Marcovina, PhD, ScD\*

Greg Strylewicz, PhD\*\*

John Albers, PhD

**NIH/NIDDK(Bethesda, MD)**

Judith Fradkin, MD

Sanford Garfield, PhD

**Centers for Disease Control & Prevention (Atlanta, GA)**

Edward Gregg, PhD

Ping Zhang, PhD

\* denotes Principal Investigator

\*\* denotes Program Coordinator

SUPPLEMENTARY DATA

**Supplementary Table 1.** Incidence rates (cases/100 person-years) of diabetes or HbA<sub>1c</sub> ≥6.5% (48 mmol/mol) by study period, treatment, and self-reported race/ethnicity.

| Outcome                             | Study period | Treatment* | Overall | White | African-American | Hispanic | American Indian | Asian or Pacific Islander |
|-------------------------------------|--------------|------------|---------|-------|------------------|----------|-----------------|---------------------------|
| Diabetes by glucose                 | DPP          | Plac       | 8.6     | 8.5   | 8.0              | 9.1      | 7.9             | 11.4                      |
|                                     |              | Met        | 6.2     | 6.3   | 5.1              | 6.7      | 6.7             | 5.9                       |
|                                     |              | ILS        | 4.3     | 4.7   | 4.1              | 3.6      | 3.9             | 3.7                       |
|                                     | Total        | Plac       | 6.8     | 6.1   | 8.8              | 7.0      | 6.5             | 10.2                      |
|                                     |              | Met        | 5.4     | 5.2   | 6.1              | 5.0      | 6.5             | 5.2                       |
|                                     |              | ILS        | 4.9     | 4.7   | 6.1              | 5.3      | 4.2             | 3.8                       |
| Diabetes by HbA <sub>1c</sub> ≥6.5% | DPP          | Plac       | 8.8     | 6.7   | 18.3             | 7.2      | 11.5            | 11.7                      |
|                                     |              | Met        | 5.1     | 3.7   | 12.5             | 4.6      | 3.3             | 2.6                       |
|                                     |              | ILS        | 4.6     | 3.8   | 10.0             | 2.9      | 6.2             | 3.3                       |
|                                     | Total        | Plac       | 5.0     | 4.1   | 9.2              | 4.6      | 5.9             | 6.3                       |
|                                     |              | Met        | 3.1     | 2.2   | 6.6              | 3.0      | 3.7             | 3.1                       |
|                                     |              | ILS        | 3.5     | 3.1   | 5.8              | 3.0      | 4.6             | 3.5                       |

\* Plac=placebo, Met=metformin, ILS=intensive lifestyle intervention.

The sample sizes were 922 (placebo), 911 (metformin), and 932 (lifestyle), and 2765 (total of three treatment groups).

SUPPLEMENTARY DATA

**Supplemental Figure 1.** Study flowchart.

- DPP enrolled participants over a 3-year period ending in June 1999. Therefore, participants had varying durations of DPP followup depending on their year of enrollment.
- DPP participants who had not died or withdrawn consent by September 1, 2002 were eligible for DPPOS.
- The number of participants examined in Year 6 of DPPOS are lower than for other years because the close of data for analysis occurred before all follow-up examinations were scheduled.

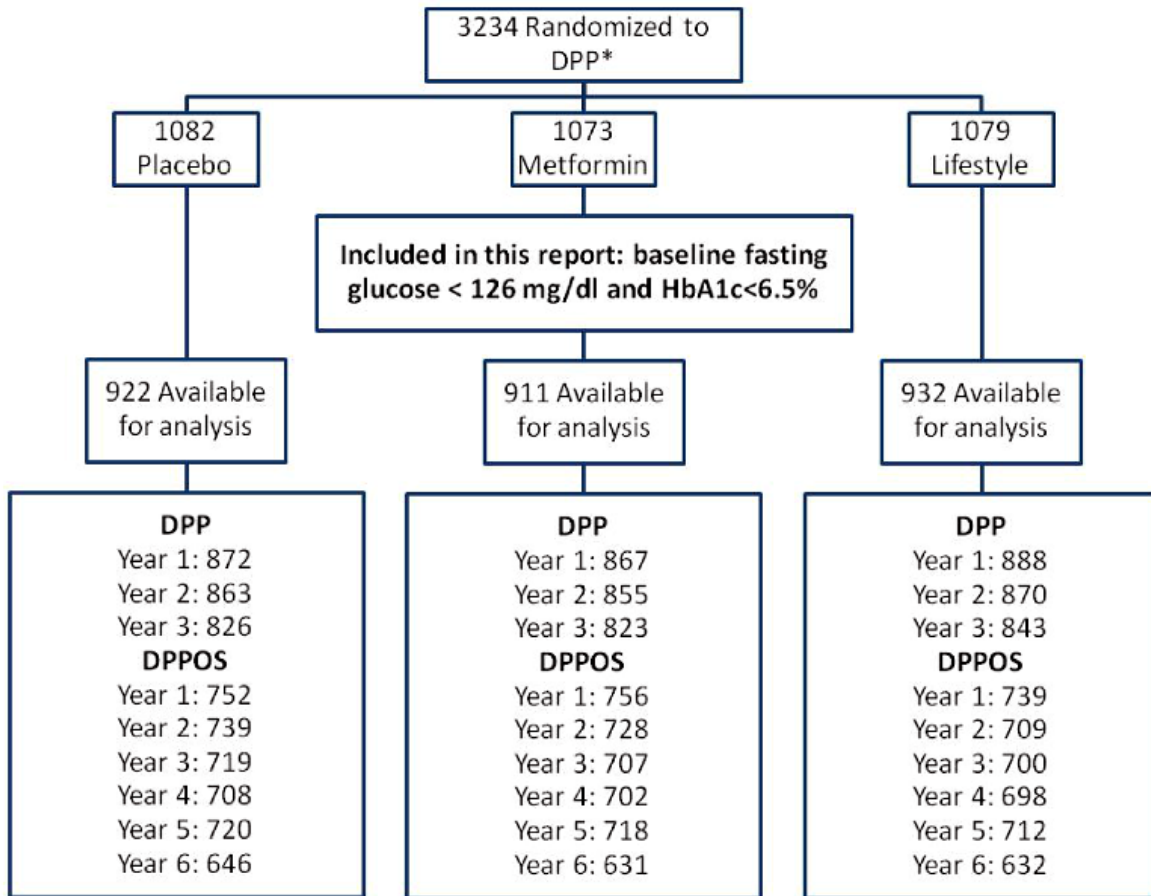

Supplement: supp_dc14-0886v140886_DC140886SupplementaryData.pdf [file supp_dc14-0886v140886_DC140886SupplementaryData.pdf]
